# Supplementary material for: Pain distress: the negative emotion associated with procedures in ICU patients
Source: Springer Nature journal article supplement (doi:10.1007/s00134-018-5344-0), 2018-08-21
Supplement: MOESM1 [file 16061468]

**Electronic Supplement Table 1.**

**Study procedures and operational definitions**

| **PROCEDURE** | **OPERATIONAL DEFINITION** |
| --- | --- |
| Turning | Turning the patient from supine to prone or vice versa |
| Positioning | Moving the patient up or down in the bed |
| Mobilization | Getting out of the bed or chair |
| Respiratory exercises | Coughing, deep breathing |
| Peripheral blood draw | Insertion of a catheter into a vein to draw out blood |
| Peripheral intravenous (IV) line insertion | Insertion of a catheter into a vein to give medications or fluids |
| Arterial line insertion | Insertion of a catheter into an artery to monitor arterial pressure and draw blood |
| Endotracheal suctioning | Insertion of a suction catheter into an endotracheal tube to aspirate secretions |
| Tracheal suctioning | Insertion of a suction catheter into a tracheostomy to aspirate secretions |
| Chest tube removal | Removal of a tube from the mediastinum or pleural space |
| Wound drain removal | Removal of a drain from a wound (e.g., drain inserted during abdominal surgery) |
| Wound care | Cleaning, dressing change |
